# Supplementary material
Source: PubMed Central journal article supplement (PMC5828942)
Supplement: NIHMS903347-supplement-supplement_1.pdf [file NIHMS903347-supplement-supplement_1.pdf]

**Table S1.** Identity and ADS activity levels of plaque bacterial strains [Huang et al., 2015].

| STUDY CODE                            | ACCESSION NUMBER | HOT NO.* | CLOSEST RELATIVE                                                    | SOURCE     | ADS ACTIVITY (Mean ±SD) |
|---------------------------------------|------------------|----------|---------------------------------------------------------------------|------------|-------------------------|
|                                       |                  |          | <i>Streptococcus gordonii</i> DL1                                   | Lab strain | 339.3±33.0              |
|                                       |                  |          | <i>arcA</i> -deficient strains of <i>S. gordonii</i>                | Lab strain | 0                       |
| <i>Streptococcus parasanguinis</i> A1 | KF733681.1       | 721      | <i>Streptococcus parasanguinis</i> ChDC B356                        | CF         | 688.0±57.1*             |
| <i>Streptococcus intermedius</i> A2   | KF733728.1       | 644      | <i>Streptococcus intermedius</i> ChDC B589                          | CF         | 390.1±17.3*             |
| <i>Streptococcus intermedius</i> A3   | KF733728.1       | 644      | <i>Streptococcus intermedius</i> ChDC B589                          | CF         | 476.9±43.8*             |
| <i>Streptococcus intermedius</i> A4   | KF733728.1       | 644      | <i>Streptococcus intermedius</i> ChDC B589                          | CF         | 233.1±15.7              |
| <i>Streptococcus intermedius</i> A5   | KF733728.1       | 644      | <i>Streptococcus intermedius</i> ChDC B589                          | CF         | 252.85±61.79            |
| <i>Streptococcus intermedius</i> A6   | KF733728.1       | 644      | <i>Streptococcus intermedius</i> ChDC B589                          | CF         | 237.5±11.5              |
| <i>Streptococcus gordonii</i> A7      | CP000725.1       | 622      | <i>Streptococcus gordonii</i> str. Challis substr. CH1 <sup>□</sup> | CA         | 283.3±5.2               |
| <i>Streptococcus gordonii</i> A8      | NR_074516.1      | 622      | <i>Streptococcus gordonii</i> str. Challis substr. CH1              | CF         | 431.9±15.4*             |
| <i>Streptococcus gordonii</i> A9      | NR_115242.1      | 622      | <i>Streptococcus gordonii</i> ATCC 10558                            | CA         | 244.8±10.7              |
| <i>Streptococcus gordonii</i> A10     | NR_115242.1      | 622      | <i>Streptococcus gordonii</i> ATCC 10558                            | CA         | 241.3±15.9              |
| <i>Streptococcus gordonii</i> A11     | NR_115242.1      | 622      | <i>Streptococcus gordonii</i> ATCC 10558                            | CF         | 354.8±20.9*             |
| <i>Streptococcus australis</i> A12    | NR_036936.1      | 073      | <i>Streptococcus australis</i> AI-1*                                | CF         | 309.2±1.4               |
| <i>Streptococcus australis</i> A13    | NR_036936.1      | 073      | <i>Streptococcus australis</i> AI-1*                                | CF         | 287.3±12.7              |
| <i>Streptococcus sanguinis</i> A14    | CP000387.1       | 758      | <i>Streptococcus sanguinis</i> SK36                                 | CF         | 129.0±5.6               |
| <i>Streptococcus sanguinis</i> A15    | CP000387.1       | 758      | <i>Streptococcus sanguinis</i> SK36                                 | CF         | 119.7±3.7               |
| <i>Streptococcus sanguinis</i> A16    | CP000387.1       | 758      | <i>Streptococcus sanguinis</i> SK36                                 | CF         | 129.1±10.4              |
| <i>Streptococcus sanguinis</i> A17    | CP000387.1       | 758      | <i>Streptococcus sanguinis</i> SK36                                 | CF         | 94.1±4.3                |
| <i>Streptococcus sanguinis</i> A18    | CP000387.1       | 758      | <i>Streptococcus sanguinis</i> SK36                                 | CF         | 107.1±9.1               |
| <i>Streptococcus sanguinis</i> A19    | CP000387.1       | 758      | <i>Streptococcus sanguinis</i> SK36                                 | CF         | 98.0±5.7                |
| <i>Streptococcus sanguinis</i> A20    | CP000387.1       | 758      | <i>Streptococcus sanguinis</i> SK36                                 | CF         | 93.1±1.4                |
| <i>Streptococcus sanguinis</i> A21    | CP000387.1       | 758      | <i>Streptococcus sanguinis</i> SK36                                 | CF         | 116.8±14.0              |
| <i>Streptococcus sanguinis</i> A22    | CP000387.1       | 758      | <i>Streptococcus sanguinis</i> SK36                                 | CF         | 88.9±10.0               |
| <i>Streptococcus sanguinis</i> A23    | NR_113260.1      | 758      | <i>Streptococcus sanguinis</i> SK1284_K2-1                          | CA         | 127.6±1.1               |
| <i>Streptococcus sanguinis</i> A24    | NR_113260.1      | 758      | <i>Streptococcus sanguinis</i> JCM 5708                             | CF         | 45.2±6.0                |
| <i>Streptococcus sanguinis</i> A25    | NR_113260.1      | 758      | <i>Streptococcus sanguinis</i> JCM 5708                             | CF         | 50.2±3.4                |
| <i>Streptococcus sanguinis</i> A26    | NR_113260.1      | 758      | <i>Streptococcus sanguinis</i> JCM 5708                             | CF         | 46.0±0.3                |
| <i>Streptococcus sanguinis</i> A27    | NR_113260.1      | 758      | <i>Streptococcus sanguinis</i> JCM 5708                             | CF         | 63.4±0.0                |
| <i>Streptococcus sanguinis</i> A28    | NR_113260.1      | 758      | <i>Streptococcus sanguinis</i> JCM 5708                             | CF         | 56.4±13.0               |
| <i>Streptococcus sanguinis</i> A29    | NR_113260.1      | 758      | <i>Streptococcus sanguinis</i> JCM 5708                             | CF         | 187.1±20.3              |
| <i>Streptococcus sanguinis</i> A30    | NR_113260.1      | 758      | <i>Streptococcus sanguinis</i> JCM 5708                             | CF         | 173.3±4.0               |
| <i>Streptococcus sanguinis</i> A31    | NR_113260.1      | 758      | <i>Streptococcus sanguinis</i> JCM 5708                             | CF         | 246.2±2.4               |
| <i>Streptococcus sanguinis</i> A32    | NR_113260.1      | 758      | <i>Streptococcus sanguinis</i> JCM 5708                             | CF         | 227.3±0.0               |
| <i>Streptococcus sanguinis</i> A33    | NR_113260.1      | 758      | <i>Streptococcus sanguinis</i> JCM 5708                             | CF         | 199.2±8.3               |
| <i>Streptococcus sanguinis</i> A34    | NR_113260.1      | 758      | <i>Streptococcus sanguinis</i> JCM 5708                             | CF         | 200.6±14.6              |
| <i>Streptococcus sanguinis</i> A35    | NR_113260.1      | 758      | <i>Streptococcus sanguinis</i> JCM 5708                             | CF         | 201.9±15.2              |
| <i>Streptococcus sanguinis</i> A36    | NR_113260.1      | 758      | <i>Streptococcus sanguinis</i> JCM 5708                             | CF         | 263.4±29.9              |
| <i>Streptococcus sanguinis</i> A37    | NR_113260.1      | 758      | <i>Streptococcus sanguinis</i> JCM 5708                             | CF         | 227.9±89.7              |
| <i>Streptococcus sanguinis</i> A38    | NR_113260.1      | 758      | <i>Streptococcus sanguinis</i> JCM 5708                             | CF         | 167.7±9.9               |
| <i>Streptococcus sanguinis</i> A39    | NR_113260.1      | 758      | <i>Streptococcus sanguinis</i> JCM 5708                             | CF         | 198.1±5.1               |
| <i>Streptococcus sanguinis</i> A40    | NR_113260.1      | 758      | <i>Streptococcus sanguinis</i> JCM 5708                             | CF         | 212.5±0.6               |
| <i>Streptococcus sanguinis</i> A41    | NR_113260.1      | 758      | <i>Streptococcus sanguinis</i> JCM 5708                             | CF         | 144.0±10.0              |

|                                    |             |     |                                           |    |            |
|------------------------------------|-------------|-----|-------------------------------------------|----|------------|
| <i>Streptococcus sanguinis</i> A42 | NR_113260.1 | 758 | <i>Streptococcus sanguinis</i> JCM 5708   | CF | 190.1±10.6 |
| <i>Streptococcus sanguinis</i> A43 | NR_113260.1 | 758 | <i>Streptococcus sanguinis</i> JCM 5708   | CF | 106.4±4.0  |
| <i>Streptococcus sanguinis</i> A44 | NR_113260.1 | 758 | <i>Streptococcus sanguinis</i> JCM 5708   | CF | 104.3±4.1  |
| <i>Streptococcus sanguinis</i> A45 | NR_113260.1 | 758 | <i>Streptococcus sanguinis</i> JCM 5708   | CA | 161.3±3.3  |
| <i>Streptococcus sanguinis</i> A46 | NR_113260.1 | 758 | <i>Streptococcus sanguinis</i> JCM 5708   | CA | 169.8±6.4  |
| <i>Streptococcus sanguinis</i> A47 | NR_113260.1 | 758 | <i>Streptococcus sanguinis</i> JCM 5708   | CA | 221.3±4.8  |
| <i>Streptococcus sanguinis</i> A48 | NR_113260.1 | 758 | <i>Streptococcus sanguinis</i> JCM 5708   | CA | 136.9±4.3  |
| <i>Streptococcus sanguinis</i> A49 | NR_113260.1 | 758 | <i>Streptococcus sanguinis</i> JCM 5708   | CA | 238.2±31.1 |
| <i>Streptococcus sanguinis</i> A50 | NR_113260.1 | 758 | <i>Streptococcus sanguinis</i> JCM 5708   | CA | 182.0±39.3 |
| <i>Streptococcus sanguinis</i> A51 | KF733682.1  | 758 | <i>Streptococcus sanguinis</i> ChDC B357  | CF | 250.8±1.3  |
| <i>Streptococcus cristatus</i> A52 | NR_115274.1 | 578 | <i>Streptococcus cristatus</i> ATCC 51100 | CA | 187.5±41.4 |
| <i>Streptococcus cristatus</i> A53 | NR_115274.1 | 578 | <i>Streptococcus cristatus</i> ATCC 51100 | CA | 129.2±31.6 |
| <i>Streptococcus cristatus</i> A54 | GU470899.1  | 578 | <i>Streptococcus cristatus</i> F0329      | CA | 160.0±26.2 |
| <i>Streptococcus cristatus</i> A55 | GU470899.1  | 578 | <i>Streptococcus cristatus</i> F0329      | CA | 159.0±9.1  |
| <i>Streptococcus cristatus</i> A56 | GU470899.1  | 578 | <i>Streptococcus cristatus</i> F0329      | CA | 185.9±41.8 |

The 56 ADS-positive strains identified had greater than 99% sequence similarity with their assigned bacterial taxa, as derived from their database accession numbers. HOT = Human oral taxon ID from the Human Oral Microbiome Database. ADS activity was expressed as nanomoles of citrulline generated per minute per milligram of protein. An asterisk (\*) indicates that the bacterial strain expressed higher ADS activity than *S. gordonii* DL1. SD = Standard deviation.

<sup>1</sup> The closest relative strains to *S. gordonii* A7 are *Streptococcus* sp. JCM 5703 and *S. gordonii* strain Challis substrain CH1.

<sup>2</sup> The closest relative strains to *S. australis* A12 and A13 are *S. australis* AI-1, but also *Streptococcus rubneri* LMG 27207 (accession No.: NR\_109720.1). Because A12 and A13 were collected from dental plaque and are ADS-positive, whereas the *S. rubneri* strain in the database is an ADS-negative throat isolate, A12 and A13 will be considered herein as strains of *S. australis*.

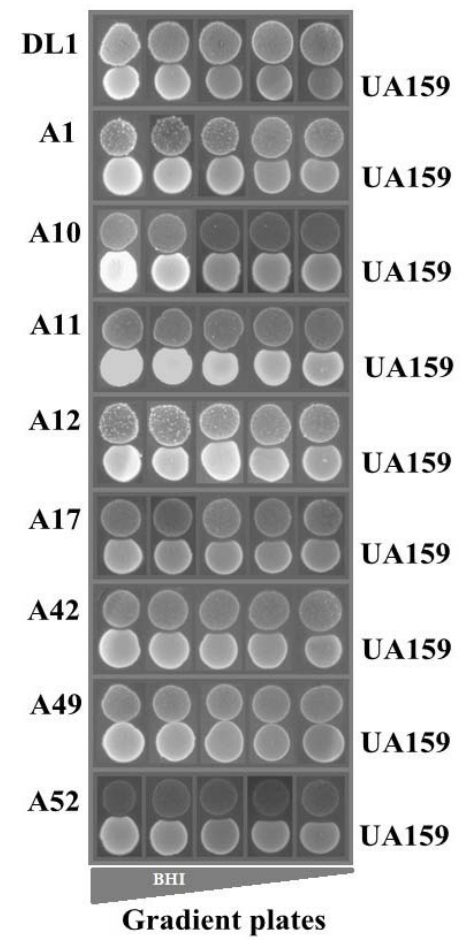

**Figure S1.** Growth inhibition of arginolytic strains on *S. mutans* UA159 using gradient BHI plates. Arginolytic strains were spotted first, and *S. mutans* was spotted 24 hr later.

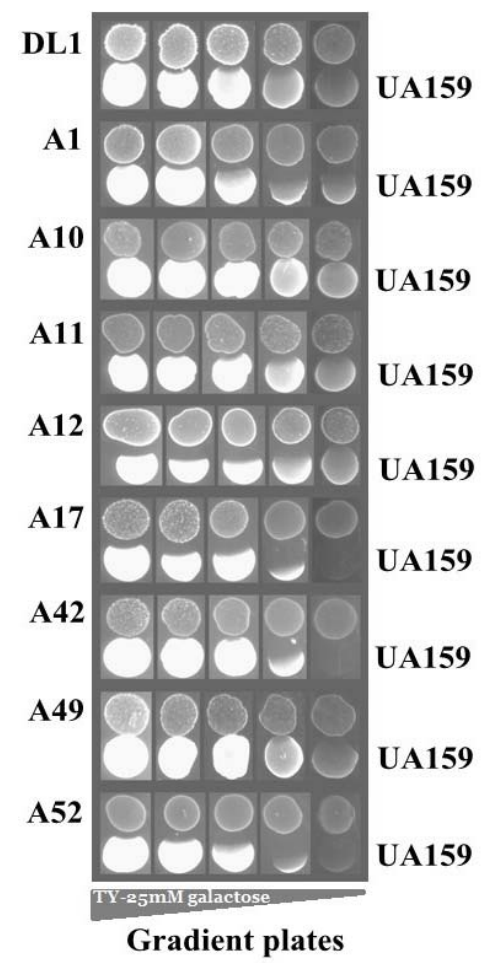

**Figure S2.** Growth inhibition of arginolytic strains on *S. mutans* UA159 using gradient TY-25mM galactose plates. Arginolytic strains were spotted first, and *S. mutans* was spotted 24 h later.
